# Supplementary material
Source: PubMed Central journal article supplement (PMC6439839)

## Supplementary Online Content

Cremolini C, Rossini D, Dell'Aquila E, et al. Rechallenge for patients with *RAS* and *BRAF* wild-type metastatic colorectal cancer with acquired resistance to first-line cetuximab and irinotecan: a phase 2 single-arm clinical trial. *JAMA Oncol*. Published online November 21, 2018. doi:10.1001/jamaoncol.2018.5080

**eTable 1.** List of Oncogenes and Tumour Suppressor Genes analyzed in ctDNA

**eTable 2.** Baseline Patients' and Disease Characteristics

**eTable 3.** Most Common Grade 3/4 Adverse Events

**eTable 4.** *RAS* Status on ctDNA Collected at Rechallenge Baseline and Best Response According to RECIST 1.1

**eFigure.** Kaplan-Meier Estimates of Progression-Free Survival and Overall Survival in the Study Population

This supplementary material has been provided by the authors to give readers additional information about their work.

**eTable 1.** List of Oncogenes and Tumour Suppressor Genes analyzed in ctDNA

|              |               |                   |                |               |
|--------------|---------------|-------------------|----------------|---------------|
| <i>ABL1</i>  | <i>AKT1</i>   | <i>ALK</i>        | <i>APC</i>     | <i>ATM</i>    |
| <i>BRAF</i>  | <i>CDH1</i>   | <i>CDKN2A</i>     | <i>CSF1R</i>   | <i>CTNNB1</i> |
| <i>EGFR</i>  | <i>ERBB2</i>  | <i>ERBB4</i>      | <i>EZH2</i>    | <i>FBXW7</i>  |
| <i>FGFR1</i> | <i>FGFR2</i>  | <i>FGFR3</i>      | <i>FLT3</i>    | <i>GNA11</i>  |
| <i>GNAS</i>  | <i>GNAQ</i>   | <i>HNF1A</i>      | <i>HRAS</i>    | <i>IDH1</i>   |
| <i>IDH2</i>  | <i>JAK2</i>   | <i>KDR/VEGFR2</i> | <i>KIT</i>     | <i>KRAS</i>   |
| <i>MET</i>   | <i>MLH1</i>   | <i>MPL</i>        | <i>NOTCH1</i>  | <i>NPM1</i>   |
| <i>NRAS</i>  | <i>PDGFRA</i> | <i>PIK3CA</i>     | <i>PTEN</i>    | <i>PTPN11</i> |
| <i>RB1</i>   | <i>RET</i>    | <i>SMAD4</i>      | <i>SMARCB1</i> | <i>SMO</i>    |
| <i>SRC</i>   | <i>STK11</i>  | <i>TP53</i>       | <i>VHL</i>     |               |

**eTable 2. Baseline Patients' and Disease Characteristics**

| <b>Characteristic</b>                                                        | <b>Study population<br/>(N=28)</b> |
|------------------------------------------------------------------------------|------------------------------------|
| <b>Age in years (median (range))</b>                                         | 69 (45-79)                         |
| <b>Sex</b>                                                                   |                                    |
| <b>Male</b>                                                                  | 19 (68%)                           |
| <b>Female</b>                                                                | 9 (32%)                            |
| <b>ECOG PS<sup>a</sup></b>                                                   |                                    |
| <b>0</b>                                                                     | 18 (64%)                           |
| <b>1-2</b>                                                                   | 10 (36%)                           |
| <b>Synchronous Metastases</b>                                                |                                    |
| <b>Yes</b>                                                                   | 20 (71%)                           |
| <b>No</b>                                                                    | 8 (29%)                            |
| <b>Prior Adjuvant Chemotherapy</b>                                           |                                    |
| <b>Yes</b>                                                                   | 8 (29%)                            |
| <b>No</b>                                                                    | 20 (71%)                           |
| <b>Primary Tumor Site</b>                                                    |                                    |
| <b>Right</b>                                                                 | 9 (32%)                            |
| <b>Left</b>                                                                  | 13 (47%)                           |
| <b>Rectum</b>                                                                | 6 (21%)                            |
| <b>Number of Metastatic Sites</b>                                            |                                    |
| <b>1</b>                                                                     | 7 (25%)                            |
| <b>&gt;1</b>                                                                 | 21 (75%)                           |
| <b>Liver Only Metastases</b>                                                 |                                    |
| <b>Yes</b>                                                                   | 5 (18%)                            |
| <b>No</b>                                                                    | 23 (82%)                           |
| <b>Resected Primary Tumor</b>                                                |                                    |
| <b>Yes</b>                                                                   | 25 (89%)                           |
| <b>No</b>                                                                    | 3 (11%)                            |
| <b>Mucinous Histology</b>                                                    |                                    |
| <b>Yes</b>                                                                   | 1 (4%)                             |
| <b>No</b>                                                                    | 27 (96%)                           |
| <b>Time from diagnosis of mCRC</b>                                           |                                    |
| <b>&lt;18 months</b>                                                         | 5 (18%)                            |
| <b>≥18 months</b>                                                            | 23 (82%)                           |
| <sup>a</sup> ECOG PS, Eastern Cooperative Oncology Group Performance Status. |                                    |

**eTable 3. Most Common Grade 3/4 Adverse Events**

| <b>G3/4 Adverse Event</b> | <b>Study population (N=28)</b> |
|---------------------------|--------------------------------|
| Diarrhoea                 | 5 (18%)                        |
| Skin Toxicity             | 4 (14%)                        |
| Neutropenia               | 4 (14%)                        |
| Hand and Foot Syndrome    | 2 (7%)                         |
| Febrile neutropenia       | 1 (4%)                         |
| Stomatitis                | 1 (4%)                         |
| Nausea                    | 1 (4%)                         |
| Conjunctivitis            | 1 (4%)                         |
| Hypomagnesemia            | 1 (4%)                         |

**eTable 4.** RAS Status on ctDNA Collected at Rechallenge Baseline and Best Response According to RECIST 1.1

| <b>Patients</b> | <b>RAS status on ctDNA</b> | <b>Objective Response</b> |
|-----------------|----------------------------|---------------------------|
| #1              | Wild-type                  | Confirmed PR              |
| #2              | KRAS G12D                  | PD                        |
| #3              | Wild-type                  | Confirmed PR              |
| #4              | Wild-type                  | PD                        |
| #5              | Wild-type                  | SD                        |
| #6              | KRAS G12D                  | PD                        |
| #7              | Wild-type                  | SD                        |
| #9              | Wild-type                  | Confirmed PR              |
| #10             | Wild-type                  | Unconfirmed PR            |
| #11             | Wild-type                  | PD                        |
| #12             | KRAS G12D                  | PD                        |
| #13             | KRAS G12V                  | PD                        |
| #15             | NRAS Q61L                  | SD                        |
| #16             | Wild-type                  | SD                        |
| #17             | KRAS G12V/ Q61H            | PD                        |
| #18             | KRAS G12V                  | PD                        |
| #19             | Wild-type                  | Confirmed PR              |
| #21             | KRAS G12D                  | SD                        |
| #22             | KRAS G12V                  | SD                        |
| #23             | KRAS G12V                  | PD                        |
| #24             | KRAS G12D                  | Unconfirmed PR            |
| #25             | KRAS G12D                  | SD                        |
| #26             | Wild-type                  | SD                        |
| #27             | Wild-type                  | PD                        |
| #28             | Wild-type                  | SD                        |

**eFigure.** Kaplan-Meier Estimates of Progression-Free Survival and Overall Survival in the Study Population

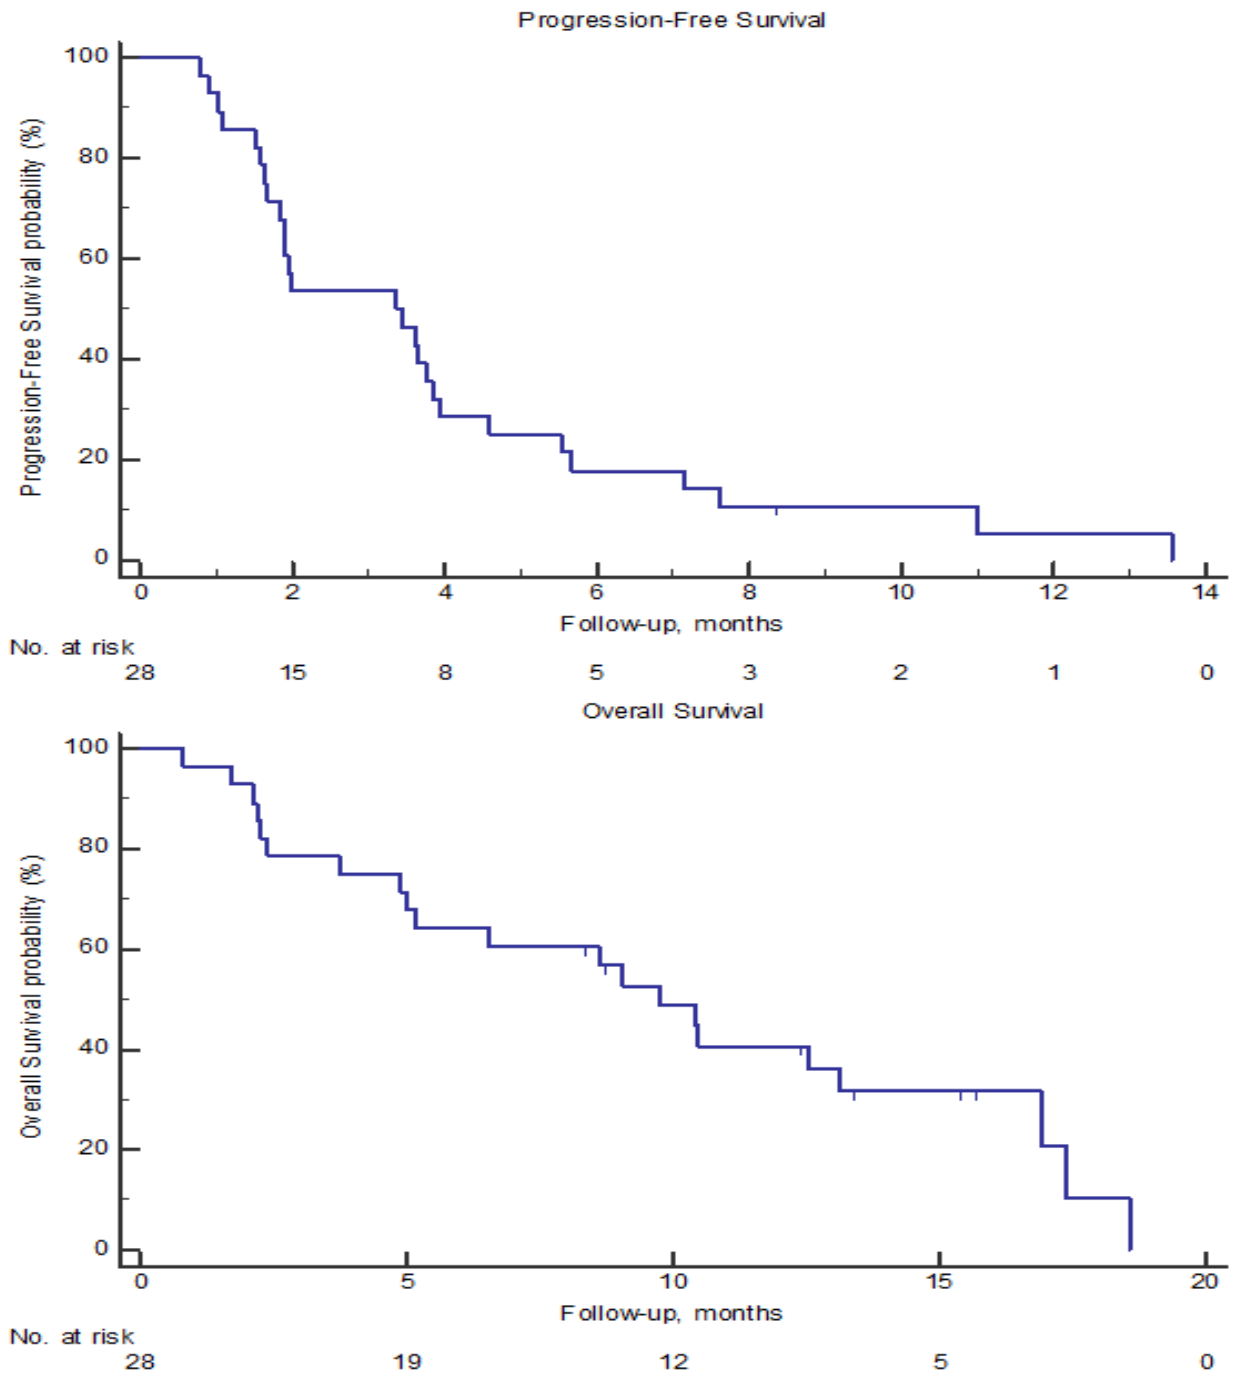

Supplement: jamaoncol-5-343-s002.pdf [file jamaoncol-5-343-s002.pdf]
